# Supplementary material for: Evidence (-based medicine) in manual medicine/manual therapy—a summary review
Source: Springer Nature journal article supplement (doi:10.1007/s00337-022-00913-y), 2022-10-10
Supplement: MOESM3 [file 23587500]

| **TEMPOROMANDIBULAR DISORDERS – CASP Checklist for Systematic Reviews** | | CASP: ✓ = yes, cs = cannot say, x = no; question 6 and 7 are left out | | | | | | | |
| --- | --- | --- | --- | --- | --- | --- | --- | --- | --- |
| **Systematic Review** | **Title** | **1. clearly focused question** | **2. right type of papers** | **3. all the important, relevant studies were included** | **4. assessing quality of the included studies** | **5. reasonable to combine results** | **8. Applicable to the local population** | **9. all important outcomes considered** | **10. benefits worth the harms and costs** |
| Armijo-Olivo et al. (2016) | Effectiveness of Manual Therapy and Therapeutic Exercise for Temporomandibular Disorders: Systematic Review and Meta-Analysis | ✓ | ✓ | ✓ | ✓ | ✓ | ✓ | ✓ | ✓ |
| Calixtre et al. (2015) | Review Manual therapy for the management of pain and limited range of motion in subjects with signs and symptoms of temporomandibular disorder: a systematic review of randomised controlled trials | ✓ | ✓ | ✓ | ✓ | ✓ | x | ✓ | ✓ |
| De Melo et al. (2021) | Manual Therapy in the Treatment of Myofascial Pain Related to Temporomandibular Disorders: A Systematic Review | ✓ | ✓ | cs | ✓ | ✓ | cs | ✓ | ✓ |
| Galindez-Ibarbengoetxea et al. (2017) | Effects of Cervical High-Velocity Low-Amplitude Techniques on Range of Motion, Strength Performance, and Cardiovascular Outcomes: A Review | ✓ | ✓ | ✓ | ✓ | ✓ | ✓ | ✓ | cs |
| Homem et al. (2014) | Effectiveness of orofacial myofunctional therapy in orthodontic patients: A systematic review | ✓ | ✓ | cs | ✓ | cs | cs | ✓ | cs |
| La Touche et al. (2020) | Effect of Manual Therapy and Therapeutic Exercise Applied to the Cervical Region on Pain and Pressure Pain Sensitivity in Patients with Temporomandibular Disorders: A Systematic Review and Meta-analysis | ✓ | ✓ | ✓ | ✓ | ✓ | ✓ | ✓ | ✓ |
| Martins et al. (2016) | Efficacy of musculoskeletal manual approach in the treatment of temporomandibular joint disorder: A systematic review with meta-analysis. | ✓ | ✓ | ✓ | ✓ | ✓ | ✓ | ✓ | ✓ |
| Van der Meer et al. (2020) | Effects of physical therapy for temporomandibular disorders on headache pain intensity: A systematic review | x | cs | x | ✓ | cs | cs | x | cs |
