# Supplementary material for: Evidence (-based medicine) in manual medicine/manual therapy—a summary review
Source: Springer Nature journal article supplement (doi:10.1007/s00337-022-00913-y), 2022-10-10
Supplement: MOESM5 [file 23587500]

| ADDITIONAL EFFECTS – CASP Checklist for Systematic Reviews |                                                                                                                                                      | CASP: ✓ = yes, cs = cannot say, x = no; question 6 and 7 are left out |                         |                                                      |                                              |                                  |                                       |                                      |                                        |
|------------------------------------------------------------|------------------------------------------------------------------------------------------------------------------------------------------------------|-----------------------------------------------------------------------|-------------------------|------------------------------------------------------|----------------------------------------------|----------------------------------|---------------------------------------|--------------------------------------|----------------------------------------|
| Systematic Review                                          | Title                                                                                                                                                | 1. clearly focused question                                           | 2. right type of papers | 3. all the important, relevant studies were included | 4. assessing quality of the included studies | 5. reasonable to combine results | 8. Applicable to the local population | 9. all important outcomes considered | 10. benefits worth the harms and costs |
| Abaraogu et al. (2017)                                     | Efficacy of Manipulative Therapy in Women with Primary Dysmenorrhea                                                                                  | ✓                                                                     | ✓                       | ✓                                                    | ✓                                            | cs                               | ✓                                     | ✓                                    | x                                      |
| Arumugam et al. (2012)                                     | Effects of external pelvic compression on form closure, force closure, and neuromotor control of the lumbopelvic spine                               | ✓                                                                     | ✓                       | ✓                                                    | ✓                                            | ✓                                | ✓                                     | ✓                                    | ✓                                      |
| Chow et al. (2021)                                         | Assessment of studies evaluating spinal manipulative therapy and infectious disease and immune system outcomes                                       | ✓                                                                     | ✓                       | ✓                                                    | cs                                           | cs                               | cs                                    | ✓                                    | cs                                     |
| Chung et al. (2015)                                        | The Association Between Cervical Spine Manipulation and Carotid Artery Dissection                                                                    | ✓                                                                     | ✓                       | ✓                                                    | ✓                                            | ✓                                | ✓                                     | ✓                                    | ✓                                      |
| Côté et al. (2021)                                         | The global summit on the efficacy and effectiveness of spinal manipulative therapy for the prevention and treatment of non-musculoskeletal disorders | ✓                                                                     | ✓                       | cs                                                   | ✓                                            | ✓                                | x                                     | cs                                   | x                                      |
| Da Silva et al. (2019)                                     | Manual therapy as treatment for chronic musculoskeletal pain in female breast cancer survivors                                                       | ✓                                                                     | ✓                       | ✓                                                    | ✓                                            | ✓                                | ✓                                     | ✓                                    | ✓                                      |
| Fernández-López et al. (2021)                              | Effects of manual therapy on the diaphragm in the musculoskeletal system                                                                             | ✓                                                                     | ✓                       | ✓                                                    | ✓                                            | cs                               | ✓                                     | ✓                                    | cs                                     |

|                               |                                                                                                                                      |   |   |   |   |    |    |   |    |
|-------------------------------|--------------------------------------------------------------------------------------------------------------------------------------|---|---|---|---|----|----|---|----|
| Kamonseki et al. (2021)       | Effects of manual therapy on fear avoidance, kinesiophobia and pain catastrophizing in individuals with chronic musculoskeletal pain | ✓ | ✓ | ✓ | ✓ | ✓  | ✓  | ✓ | CS |
| Kendall et al. (2020)         | Effects of manual therapies on stability in people with musculoskeletal pain                                                         | ✓ | ✓ | ✓ | x | ✓  | ✓  | ✓ | CS |
| Kovanur-Sampath et al. (2017) | Changes in biochemical markers following spinal manipulation                                                                         | ✓ | ✓ | ✓ | ✓ | ✓  | ✓  | ✓ | ✓  |
| Navarro-Santano et al. (2020) | Effects of joint mobilisation on clinical manifestations of sympathetic nervous system activity                                      | ✓ | ✓ | ✓ | ✓ | ✓  | CS | ✓ | ✓  |
| Rechberger et al. (2019)      | Effectiveness of an osteopathic treatment on the autonomic nervous system                                                            | ✓ | ✓ | ✓ | ✓ | CS | CS | ✓ | CS |
| Roura et al. (2021)           | Do manual therapies have a specific autonomic effect?                                                                                | ✓ | ✓ | ✓ | ✓ | CS | ✓  | ✓ | x  |
| Schulze et al. (2020)         | Efficacy of Manual Therapy on Pain, Impact of Disease, and Quality of Life in the Treatment of Fibromyalgia                          | ✓ | ✓ | ✓ | ✓ | ✓  | ✓  | ✓ | CS |
| Slater et al. (2012)          | The effectiveness of sub-group specific manual therapy for low back pain                                                             | ✓ | ✓ | ✓ | ✓ | ✓  | ✓  | ✓ | ✓  |
| Tramontano et al. (2021)      | Vertigo and balance disorders—the role of osteopathic manipulative treatment                                                         | ✓ | x | x | x | CS | x  | ✓ | x  |
| Ughreja et al. (2021)         | Effectiveness of myofascial release on pain, sleep, and quality of life in patients with fibromyalgia syndrome                       | ✓ | ✓ | ✓ | ✓ | ✓  | ✓  | ✓ | ✓  |
| Webb et al. (2016)            | Myofascial techniques: What are their effects on joint                                                                               | ✓ | ✓ | ✓ | ✓ | ✓  | ✓  | ✓ | ✓  |

|                       |                                                                                                             |   |   |   |   |   |   |   |   |
|-----------------------|-------------------------------------------------------------------------------------------------------------|---|---|---|---|---|---|---|---|
|                       | range of motion and pain?                                                                                   |   |   |   |   |   |   |   |   |
| Wong et al.<br>(2014) | Strain counterstrain<br>technique to decrease tender point palpation pain<br>compared to control conditions | ✓ | ✓ | ✓ | ✓ | ✓ | ✓ | ✓ | ✓ |
